# Supplementary material
Source: HighWire-hosted journal article supplement (http://dmd.aspetjournals.org/highwire/filestream/72606/field_highwire_adjunct_files/0/DMD83808.pdf)
Supplement: DMD83808.pdf [file DMD83808.pdf]

## Supplemental data

**Serotonin receptors of 5-HT<sub>2</sub> type in the hypothalamic arcuate nuclei (ARC) positively regulate liver cytochrome P450 *via* stimulation of the GHRH-GH hormonal pathway**

Ewa Bromek, Marta Rysz, Anna Haduch and Władysława A. Daniel

DRUG METABOLISM AND DISPOSITION

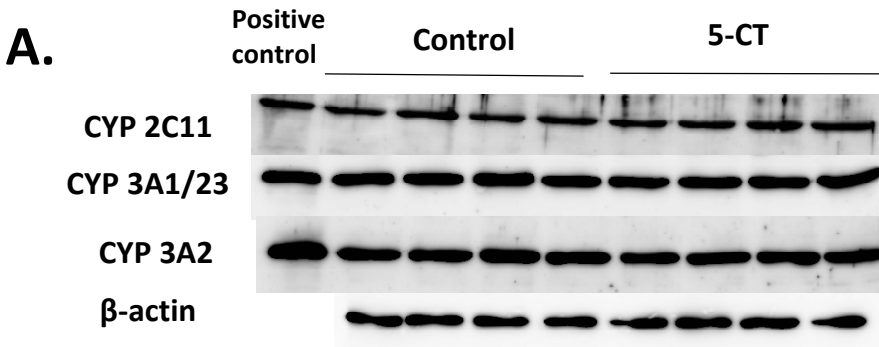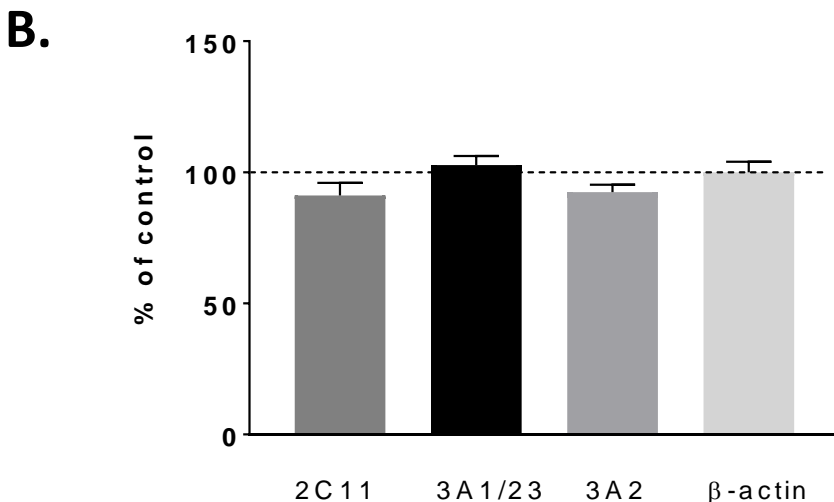

Fig. 1S The effect of the repeated injection of the 5-HT<sub>1</sub> receptor agonist 5-CT into the ARC (5  $\mu$ g/side) on the protein level of CYP2C11, CYP3A1/23 and CYP3A2 isoenzymes in rat liver microsomes. Microsomal proteins, 10  $\mu$ g, were subjected to the Western immunoblot analysis. The presented results are representative blots from four (for the control and for 5-CT) separate rats per treatment (**A**). The data are expressed as the mean  $\pm$  S.E.M. (n=6-8) (**B**). Statistical significance was assessed by Student's *t*-test.
